# Supplementary material
Source: publisher site journal article supplement (https://www.dovepress.com/get_supplementary_file.php?f=386419.docx)

Real-world clinical and patient-reported outcomes from the longitudinal telotristat ethyl treatment registry of patients with neuroendocrine tumors

Daneng Li1, Christina Darden2, Noran Osman3, Salma Sayeed3, Laurin Jackson2, Diana Garbinsky2, Aman Chauhan4

1City of Hope Comprehensive Cancer Center and Beckman Research Institute, Duarte, CA, USA; 2RTI Health Solutions, Research Triangle Park, NC, USA; 3TerSera Therapeutics, Deerfield, IL, USA; 4Markey Cancer Center, University of Kentucky, Lexington, KY, USA

SUPPLEMENTARY INFORMATION

**Figure S1.** PGIC: 6-month changes in CS symptoms


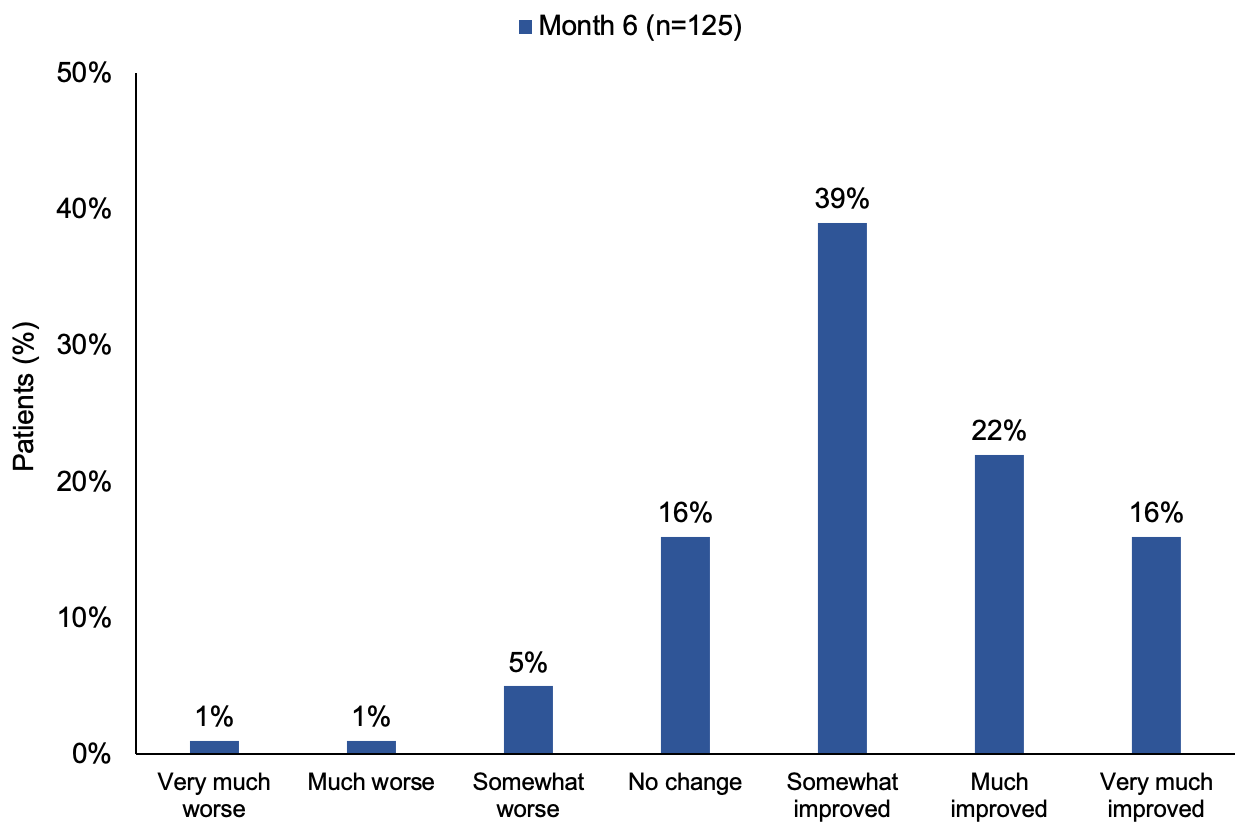


**Figure S2.** Patient-reported use of SSAs

A) Long-acting monthly SSA use


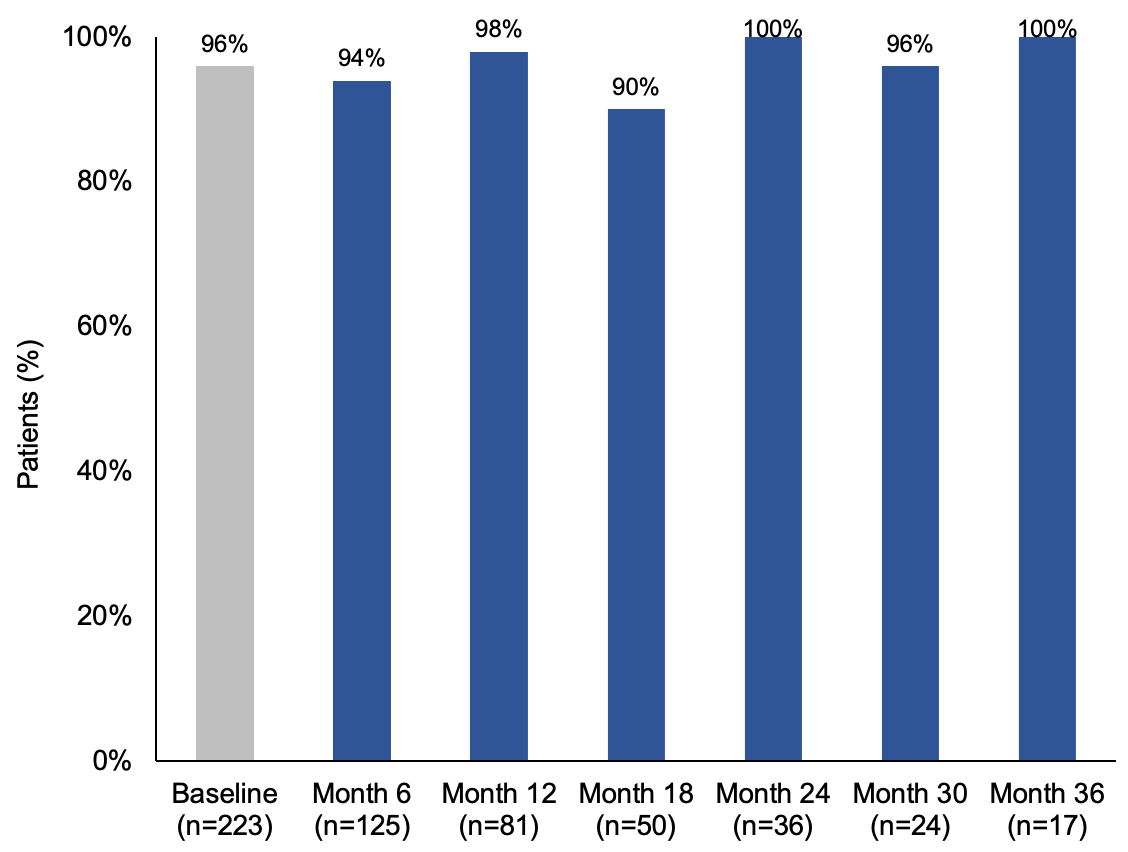


**Figure S2.** Patient-reported use of SSAs

B) Short-acting rescue SSA therapy


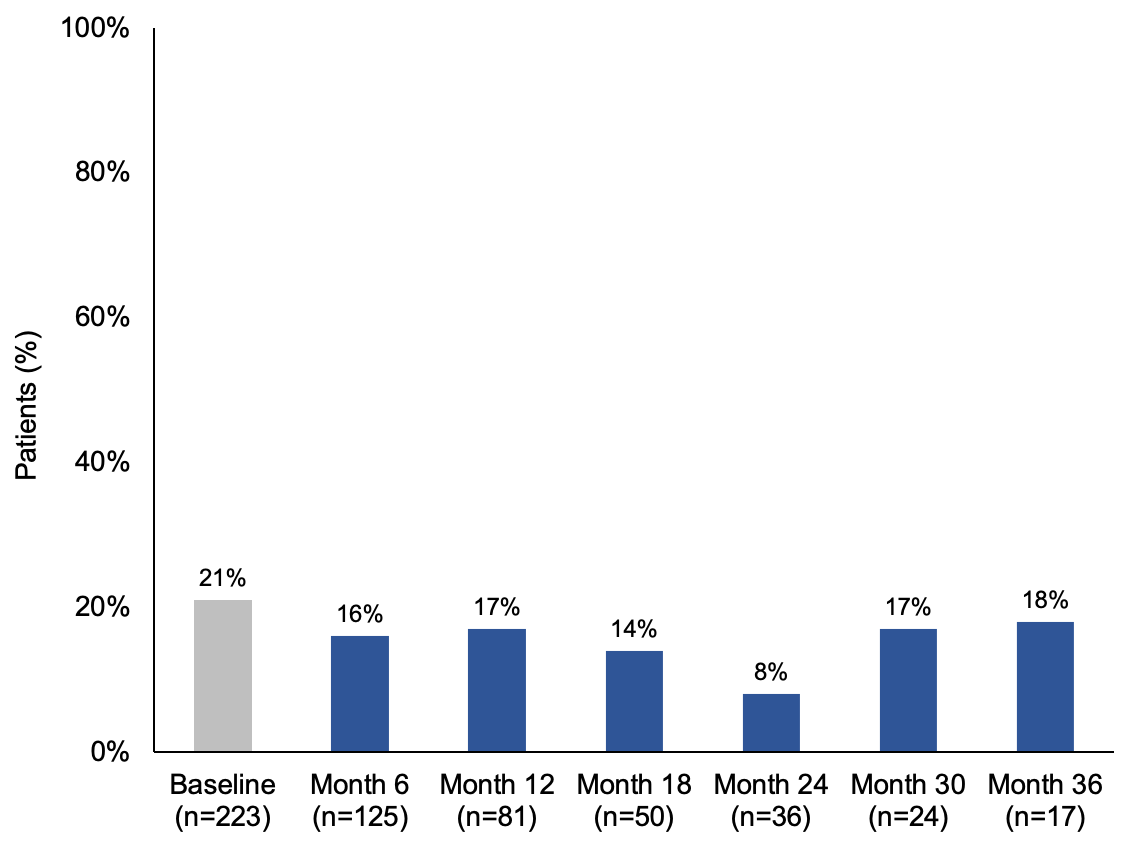


Note: At baseline, patients reported SSA use for the past 1 month; at each post-baseline timepoint, patients reported SSA use for the previous 6 months.

**Figure S3.** Patient-reported dosing and frequency of long-acting SSAs

A) Changes in dosing of long-acting monthly SSAs


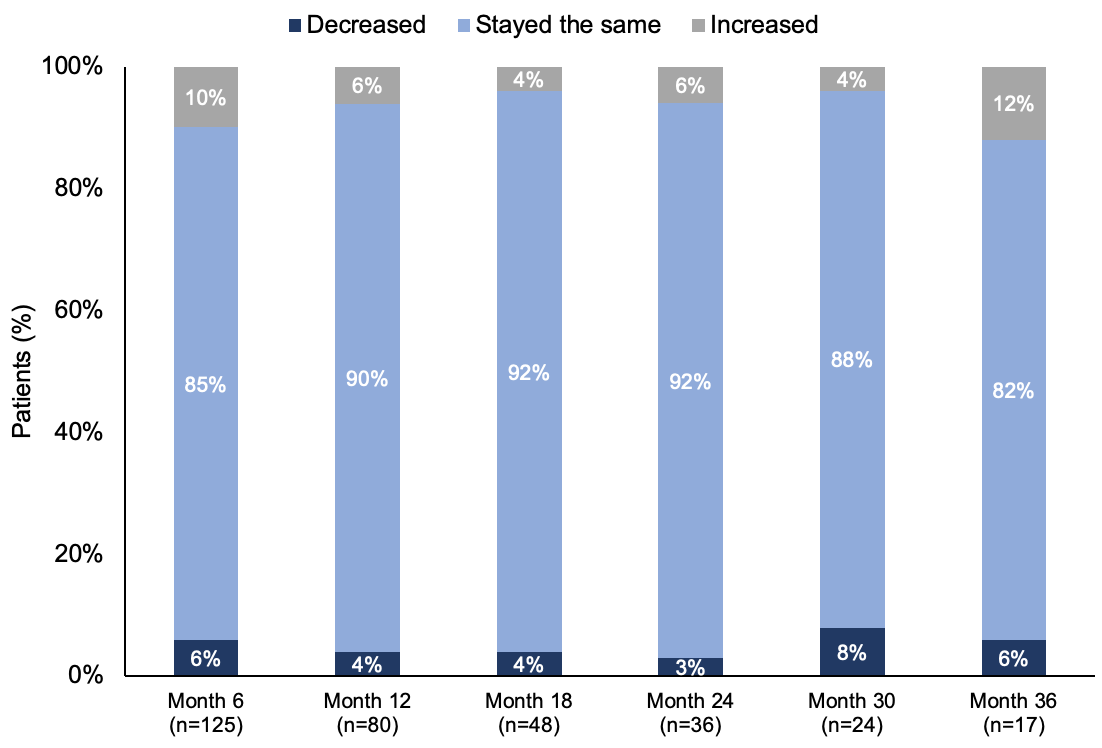


**Figure S3.** Patient-reported dosing and frequency of long-acting SSAs

B) Changes in frequency of long-acting monthly SSAs


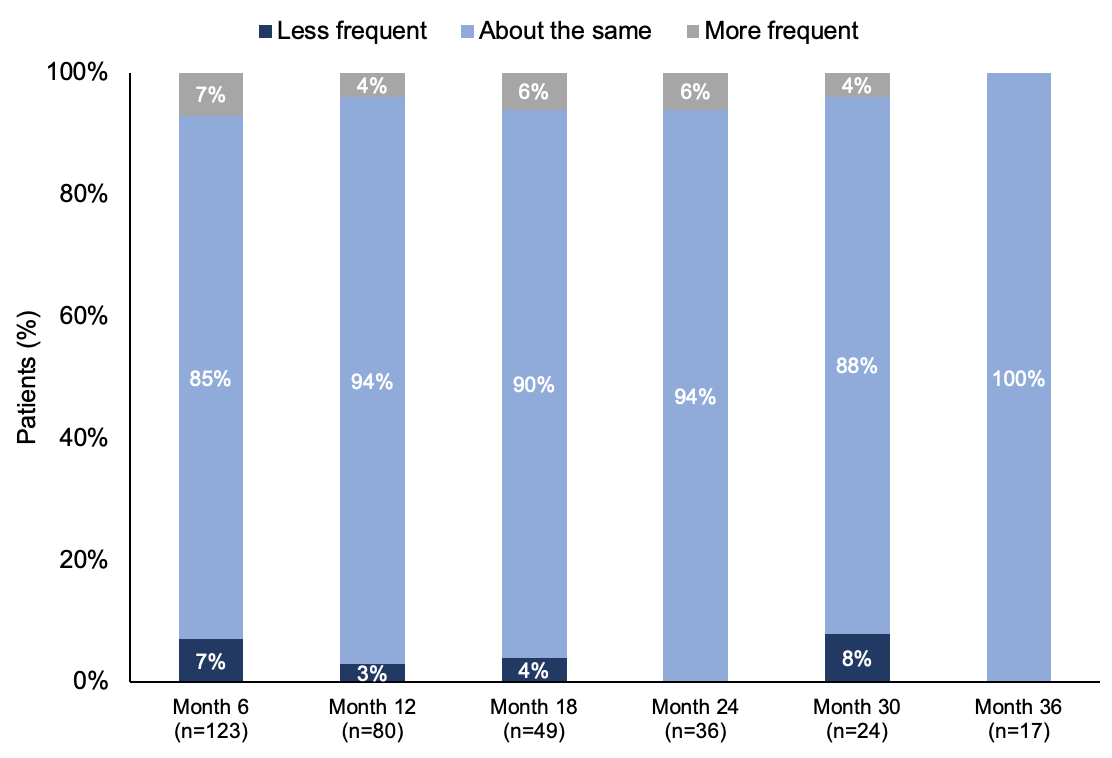


Proportions may not sum to 100% due to rounding.

**Figure S4.** Patient-reported CS-related ED visits and hospitalizations

A) Patients with ≥1 CS-related ED visit in the previous 6 months


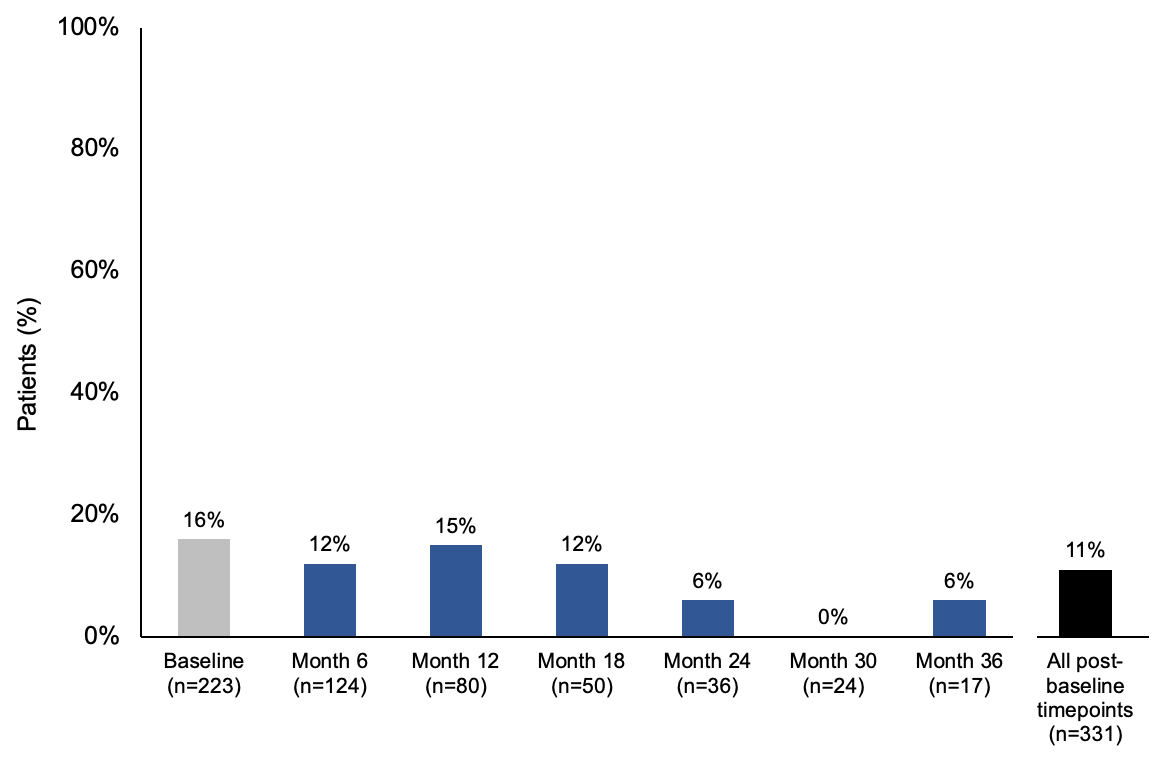


**Figure S4.** Patient-reported CS-related ED visits and hospitalizations

B) Patients with ≥1 CS-related hospitalization in the previous 6 months


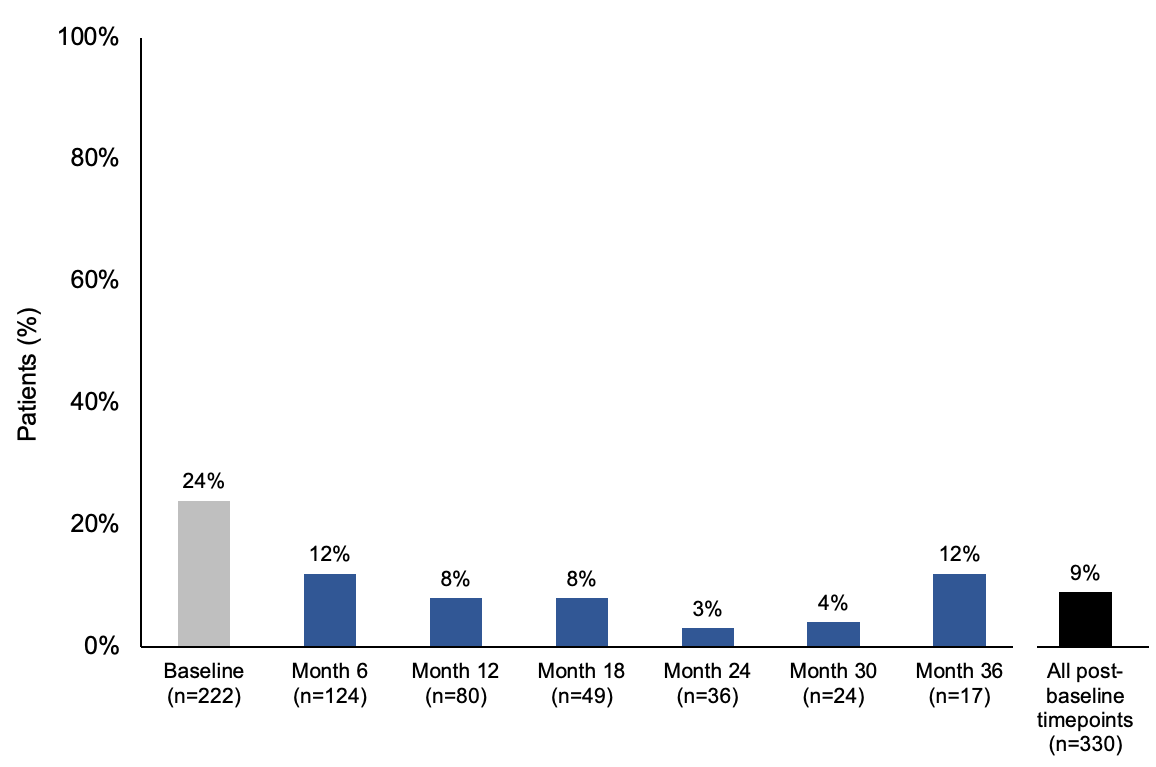

Supplement: Supplementary file 1 [file get_supplementary_file.php]
